# Supplementary material for: Techno-Economic Evaluation of Jet Fuel Production via an Alternative Gasification-Driven Biomass-to-Liquid Pathway and Benchmarking with the State-of-the-Art Fischer–Tropsch and Alcohol-to-Jet Concepts
Source: MDPI journal article supplement (doi:10.3390/en17071685), 2024-04-01
Supplement: s1 [file s1]

## *Supplementary Material*

A. Integrated Process Flow Diagram (PFD) & stream results

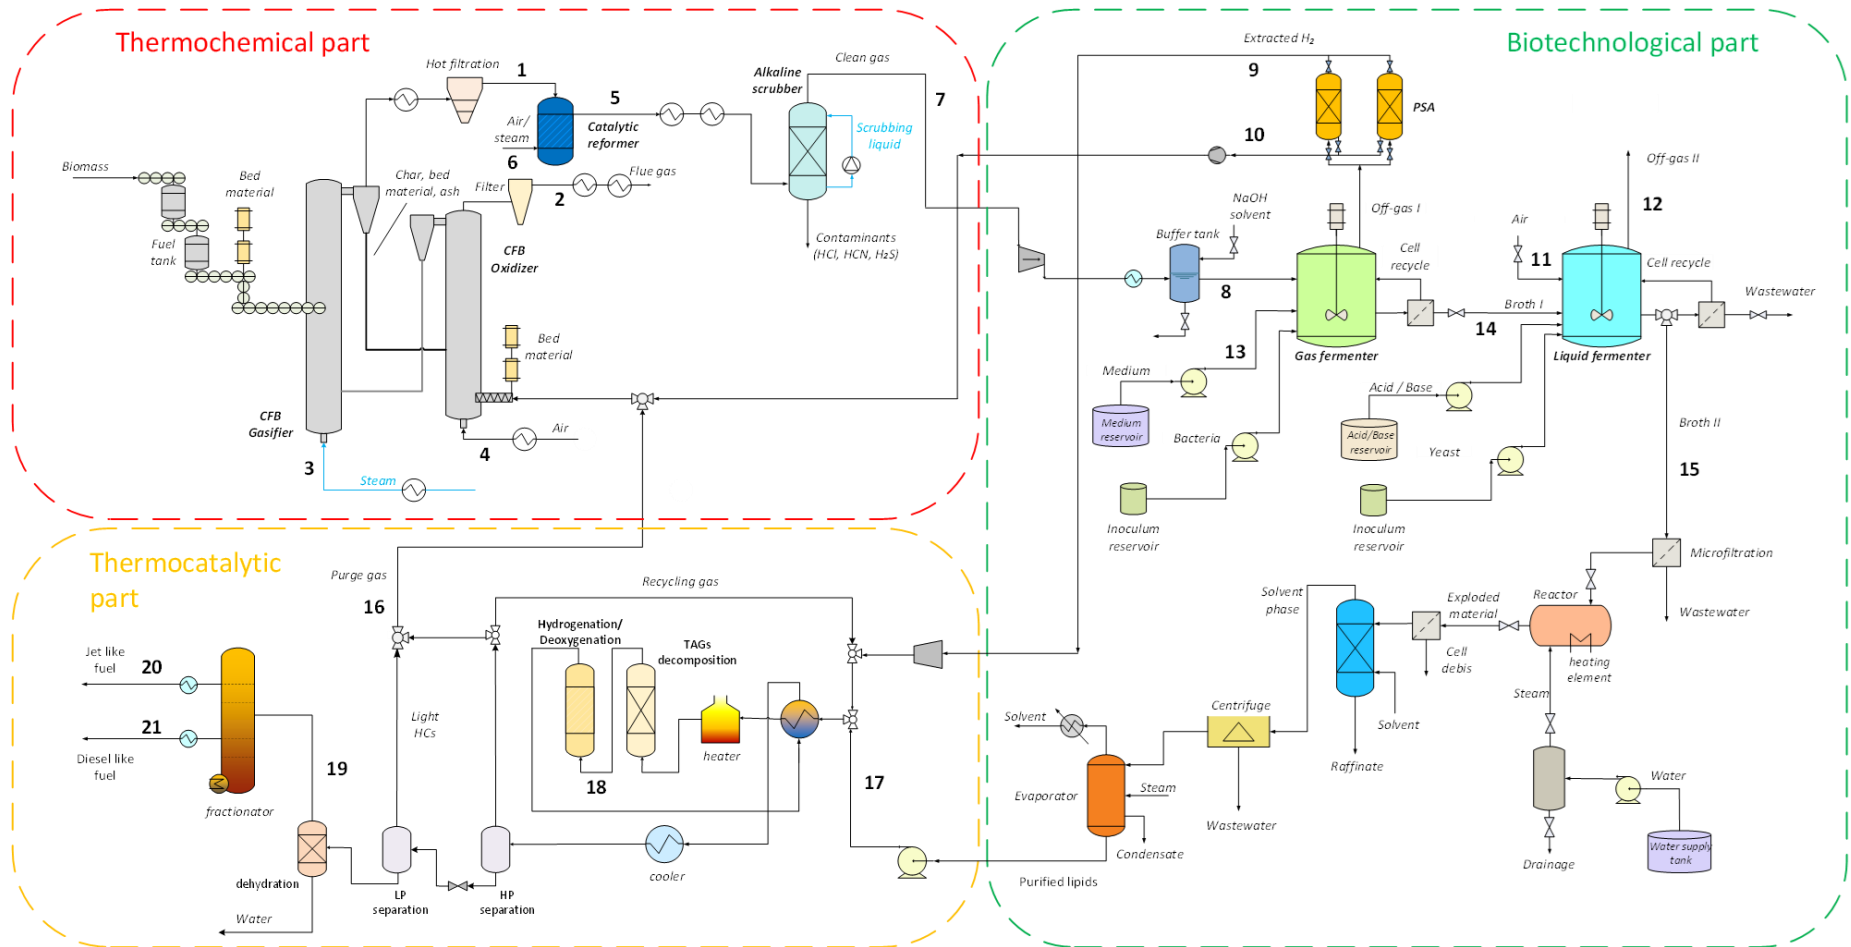

Figure S1. Integrated PFD of the BtL concept

Table S1. Stream results for the thermochemical part

| Stream No                      | 1<br>Syngas after<br>filtration | 2<br>Flue gas after<br>filtration | 3<br>Pre-heated<br>steam | 4<br>Pre-heated<br>air | 5<br>Reformed syngas<br>(ATR) | 6<br>Air<br>(ATR) | 7<br>Cooled syngas |
|--------------------------------|---------------------------------|-----------------------------------|--------------------------|------------------------|-------------------------------|-------------------|--------------------|
| Mass flow (kg/s)               | 16.99                           | 35.86                             | 7.92                     | 25.40                  | 24.19                         | 7.21              | 19.19              |
| Temp (°C)                      | 780                             | 880                               | 350                      | 400                    | 900                           | 400               | 35                 |
| Press (bar)                    | 1.3                             | 1.1                               | 1.5                      | 1.5                    | 1.1                           | 1.5               | 1.1                |
| Composition (vol. %)           |                                 |                                   |                          |                        |                               |                   |                    |
| H <sub>2</sub>                 | 30.89                           | -                                 | -                        | -                      | 32.61                         | -                 | 41.53              |
| CO                             | 12.79                           | -                                 | -                        | -                      | 15.33                         | -                 | 20.34              |
| CO <sub>2</sub>                | 14.58                           | 14.20                             | -                        | -                      | 13.15                         | -                 | 15.86              |
| H <sub>2</sub> O               | 31.95                           | 8.04                              | 100                      | -                      | 22.73                         | -                 | 1.71               |
| N <sub>2</sub>                 | 2.04                            | 73.71                             | -                        | 79.00                  | 15.38                         | 79.00             | 19.58              |
| H <sub>2</sub> S               | 178 ppm                         | -                                 | -                        | -                      | 127 ppm                       | -                 | 21 ppm             |
| CH <sub>4</sub>                | 5.26                            | -                                 | -                        | -                      | 0.75                          | -                 | 0.96               |
| NH <sub>3</sub>                | 0.19                            | -                                 | -                        | -                      | 273 ppm                       | -                 | 84 ppm             |
| HCN                            | 12 ppm                          | -                                 | -                        | -                      | -                             | -                 | -                  |
| COS                            | 10 ppm                          | -                                 | -                        | -                      | 7 ppm                         | -                 | 7 ppm              |
| C <sub>2</sub> H <sub>4</sub>  | 1.74                            | -                                 | -                        | -                      | -                             | -                 | -                  |
| C <sub>6</sub> H <sub>6</sub>  | 0.37                            | -                                 | -                        | -                      | 27 ppm                        | -                 | 27 ppm             |
| C <sub>10</sub> H <sub>8</sub> | 0.17                            | -                                 | -                        | -                      | -                             | -                 | -                  |
| O <sub>2</sub>                 | -                               | 4.05                              | -                        | 21.00                  | -                             | 21.00             | -                  |

Table S2. Stream results for the biological part

| Stream No                     | 8<br>Gas prior<br>fermenter | 9<br>Purge H <sub>2</sub> | 10<br>Gas fermenter<br>off-gas | 11<br>Air | 12<br>Liquid fermenter<br>off-gas | 13<br>Medium        | 14<br>Broth-I | 15<br>Broth-II |
|-------------------------------|-----------------------------|---------------------------|--------------------------------|-----------|-----------------------------------|---------------------|---------------|----------------|
| Mass flow (kg/s)              | 19.18                       | 0.10                      | 9.50                           | 109.9     | 115.2                             | 236.5               | 245.7         | 14.07          |
| Temp (°C)                     | 55                          | 15                        | 55                             | 28        | 28                                | 55                  | 55            | 28             |
| Press (bar)                   | 5                           | 100                       | 5                              | 1         | 1                                 | 5                   | 5             | 1              |
| Composition (vol. %)          |                             |                           |                                |           |                                   | Composition (wt. %) |               |                |
| H <sub>2</sub>                | 41.53                       | 100                       | 15.02                          | -         | -                                 | -                   | -             | -              |
| CO                            | 23.34                       | -                         | 6.56                           | -         | -                                 | -                   | -             | -              |
| CO <sub>2</sub>               | 12.86                       | -                         | 18.31                          | -         | 3.28                              | -                   | 0.15          | 0.10           |
| H <sub>2</sub> O              | 1.71                        | -                         | 2.65                           | -         | 3.74                              | 100                 | 96.74         | 87.05          |
| N <sub>2</sub>                | 19.58                       | -                         | 54.85                          | 79.00     | 75.16                             | -                   | -             | 0.10           |
| H <sub>2</sub> S              | 10 ppm                      | -                         | 44 ppm                         | -         | -                                 | -                   | -             | -              |
| CH <sub>4</sub>               | 0.96                        | -                         | 2.69                           | -         | -                                 | -                   | -             | -              |
| NH <sub>3</sub>               | 88 ppm                      | -                         | 330 ppm                        | -         | -                                 | -                   | -             | -              |
| C <sub>6</sub> H <sub>6</sub> | 27 ppm                      | -                         | 51 ppm                         | -         | -                                 | -                   | -             | -              |
| O <sub>2</sub>                | -                           | -                         | -                              | 21.00     | 17.81                             | -                   | -             | -              |
| Acetic acid                   | -                           | -                         | -                              | -         | -                                 | -                   | 3.11          | -              |
| Tripalmitin                   | -                           | -                         | -                              | -         | -                                 | -                   | -             | 3.15           |
| Triolein                      | -                           | -                         | -                              | -         | -                                 | -                   | -             | 5.93           |
| Trilinolein                   | -                           | -                         | -                              | -         | -                                 | -                   | -             | 1.65           |
| Tristearin                    | -                           | -                         | -                              | -         | -                                 | -                   | -             | 1.99           |

Table S3. Stream results for the thermocatalytic part

| Stream No                       | 16<br>Light gases | 17<br>Purified<br>TAGs | 18<br>Fatty acids/<br>propane | 19<br>Jet/Diesel<br>paraffins | 20<br>Jet-like fuel | 21<br>Diesel-like<br>fuel |
|---------------------------------|-------------------|------------------------|-------------------------------|-------------------------------|---------------------|---------------------------|
| Mass flow (kg/s)                | 0.29              | 1.82                   | 1.92                          | 1.51                          | 1.21                | 0.30                      |
| Temp (°C)                       | 30                | 50                     | 370                           | 30                            | 30                  | 30                        |
| Press (bar)                     | 1                 | 100                    | 100                           | 1                             | 1                   | 1                         |
| Composition (vol. %)            |                   | Composition (wt. %)    |                               |                               |                     |                           |
| Tripalmitin                     | -                 | 24.76                  | -                             | -                             | -                   | -                         |
| Triolein                        | -                 | 46.63                  | -                             | -                             | -                   | -                         |
| Trilinolein                     | -                 | 12.99                  | -                             | -                             | -                   | -                         |
| Tristearin                      | -                 | 15.62                  | -                             | -                             | -                   | -                         |
| Palmitic acid                   | -                 | -                      | 22.36                         | -                             | -                   | -                         |
| Oleic acid                      | -                 | -                      | 42.29                         | -                             | -                   | -                         |
| Linoleic acid                   | -                 | -                      | 11.78                         | -                             | -                   | -                         |
| Stearic acid                    | -                 | -                      | 14.17                         | -                             | -                   | -                         |
| H <sub>2</sub>                  | 78.08             | -                      | 4.58                          | -                             | -                   | -                         |
| CO                              | 4.59              | -                      | -                             | -                             | -                   | -                         |
| CO <sub>2</sub>                 | 8.41              | -                      | -                             | -                             | -                   | -                         |
| Propane                         | 4.97              | -                      | 4.83                          | -                             | -                   | -                         |
| Methane                         | 3.95              | -                      | -                             | -                             | -                   | -                         |
| C <sub>9</sub> H <sub>20</sub>  | -                 | -                      | -                             | 4.03                          | 8.52                | -                         |
| C <sub>10</sub> H <sub>22</sub> | -                 | -                      | -                             | 7.03                          | 14.87               | -                         |
| C <sub>11</sub> H <sub>24</sub> | -                 | -                      | -                             | 4.36                          | 9.23                | -                         |
| C <sub>12</sub> H <sub>26</sub> | -                 | -                      | -                             | 3.68                          | 7.78                | -                         |
| C <sub>13</sub> H <sub>28</sub> | -                 | -                      | -                             | 3.52                          | 7.44                | -                         |
| C <sub>14</sub> H <sub>30</sub> | -                 | -                      | -                             | 22.92                         | 47.15               | 1.21                      |
| C <sub>15</sub> H <sub>32</sub> | -                 | -                      | -                             | 6.90                          | 3.11                | 10.29                     |
| C <sub>16</sub> H <sub>34</sub> | -                 | -                      | -                             | 6.59                          | 1.90                | 10.80                     |
| C <sub>17</sub> H <sub>36</sub> | -                 | -                      | -                             | 28.34                         | -                   | 53.74                     |
| C <sub>18</sub> H <sub>38</sub> | -                 | -                      | -                             | 12.64                         | -                   | 23.96                     |

B. Main feedstock (crushed bark) specifications

Table S4. Feedstock (crushed bark) properties involved in the process simulations

|                                      |        |              |          |                 |        |        |
|--------------------------------------|--------|--------------|----------|-----------------|--------|--------|
| Mass flow a.r. (kg/s)                |        |              |          | 11.24           |        |        |
| Net Calorific Value LHV a.r. (MJ/kg) |        |              |          | 17.79           |        |        |
| Proximate Analysis (%)               |        |              |          |                 |        |        |
| Moisture                             |        | Fixed Carbon |          | Volatile Matter |        | Ash    |
| 8.4                                  |        | 18.5         |          | 77.8            |        | 3.7    |
| Ultimate Analysis (%)                |        |              |          |                 |        |        |
| Ash                                  | Carbon | Hydrogen     | Nitrogen | Chlorine        | Sulfur | Oxygen |
| 3.7                                  | 51.5   | 5.8          | 0.3      | -               | 0.06   | 38.64  |

C. Critical equipment list

Table S5. Main equipment considered for the industrial layout of the concept

| Equipment type                       | Additional information                                                                                     |
|--------------------------------------|------------------------------------------------------------------------------------------------------------|
| Thermochemical part                  |                                                                                                            |
| Biomass feeding system               | -                                                                                                          |
| Gasifier                             | CFB reactor + hot gas ducts including refractories                                                         |
| Oxidizer (combustor)                 | CFB reactor + hot gas ducts including refractories                                                         |
| Air, steam, and nitrogen systems     | Pre-heating and auxiliaries                                                                                |
| Ash systems                          | Ash handling and storage                                                                                   |
| Hot gas filters                      | -                                                                                                          |
| Gas coolers                          | -                                                                                                          |
| Catalytic tar reformer               | Air/steam driven autothermal reformer (ATR)                                                                |
| Alkaline scrubber                    | NaOH solvent feeding mode                                                                                  |
| Gas compression system               | -                                                                                                          |
| Biological part                      |                                                                                                            |
| Media preparation                    | Substrate/powder handling, chemical dosing for pH-correction, dissolving, sterilisation                    |
| 15 x gas fermenters (acetic acid)    | CSTR (500 m3) including agitators and circulation pumps                                                    |
| 3 x seed fermenters (acetic acid)    | CSTR (250 m3) including agitators and circulation pumps, 10% inoculation ratio                             |
| 15 x liquid fermenters (TAGs)        | CSTR (500 m3) including agitators and circulation pumps                                                    |
| 3 x seed fermenters (TAGs)           | CSTR (25 m3) including agitators and circulation pumps, 1% inoculation ratio                               |
| Microfiltration                      | DSP train for TAGs purification                                                                            |
| Steam explosion                      |                                                                                                            |
| Solvent extraction                   |                                                                                                            |
| Centrifugation                       |                                                                                                            |
| Evaporation                          |                                                                                                            |
|                                      |                                                                                                            |
| Thermocatalytic part                 |                                                                                                            |
| Hydrotreating reactor                | Hydrogenation/hydrocracking, deoxygenation                                                                 |
| Fractionating column                 | Jet/diesel fraction separation                                                                             |
| Flash tanks                          | High pressure and low pressure liquid (paraffins)/ gas (unreacted hydrogen, light hydrocarbons) separation |
| Reactor feed-effluent heat exchanger | -                                                                                                          |
| Reactor feed heater                  | -                                                                                                          |
| Reactor effluent air-blown cooler    | -                                                                                                          |
| PSA hydrogen unit                    | -                                                                                                          |

D. Microbial Oil Business case

Table S6. Capital Expenditures (CapEx) of the BtL plant (microbial oil scenario)

|                                               |                      |
|-----------------------------------------------|----------------------|
| Dual Fluidized Bed Gasification               | 80,000,000 €         |
| Catalytic Reformer                            | 8,500,000 €          |
| Gas Conditioning (coolers, alkaline scrubber) | 10,500,000 €         |
| Gas Compression                               | 5,000,000 €          |
| Gas Fermentation                              | 80,000,000 €         |
| Liquid Fermentation                           | 64,000,000 €         |
| Downstream Processing (TAGs recovery)         | 16,000,000 €         |
| Hydrotreatment/ Hydrocracking                 | -                    |
| Utilities & Storage                           | 8,000,000 €          |
| <b>Total installed costs (direct costs)</b>   | <b>272,000,000 €</b> |
| Indirect costs                                | 163,200,000 €        |
| Total direct & indirect costs                 | 435,200,000 €        |
| Contingency                                   | 43,520,000 €         |
| <b>Fixed Capital Investment (FCI)</b>         | <b>478,720,000 €</b> |
| Working Capital                               | 47,872,000 €         |
| <b>Total Capital Investment (TCI)</b>         | <b>526,592,000 €</b> |

Table S7. Annual Operational Expenditures (OpEx) of the BtL plant (microbial oil scenario)

|                                                    |                          |
|----------------------------------------------------|--------------------------|
| Feedstock costs                                    | 21,090,646 €/year        |
| Electricity                                        | 5,361,120 €/year         |
| Maintenance                                        | 9,574,400 €/year         |
| Labor costs                                        | 3,500,000 €/year         |
| Nutrients & chemicals                              | 1,054,532 €/year         |
| Property Insurance                                 | 3,351,040 €/year         |
| Solvent make-up                                    | 2,959,338 €/year         |
| Wastewater discharge                               | 1,858,164 €/year         |
| <b>Annual operational expenses</b>                 | <b>48,749,240 €/year</b> |
| Income from diesel                                 | -                        |
| Income from cellular biomass                       | 6,288,716 €/year         |
| <b>Annual revenue streams (by-product credits)</b> | <b>6,288,716 €/year</b>  |



E. Discounted cash flow analysis

Table S8. Discounted cash flow analysis for the calculation of MJSP (jet fuel scenario)

| Year                                 | Total Capital Investment (TCI) | Income*         | Operational Expenses | Cash flow         | Discount factor $1/(1+i)^{\text{year}}$ | Net Present Values | Discounted payback |
|--------------------------------------|--------------------------------|-----------------|----------------------|-------------------|-----------------------------------------|--------------------|--------------------|
| -1                                   | € 230,771,200.00               |                 |                      | -€ 230,771,200.00 | 1.00                                    | -€ 230,771,200.00  |                    |
| 0                                    | € 346,156,800.00               |                 |                      | -€ 346,156,800.00 | 1.00                                    | -€ 346,156,800.00  |                    |
| 1                                    |                                | € 95,115,944.90 | € 49,984,760.82      | € 45,131,184.08   | 0.94                                    | € 42,576,588.76    | -€ 534,351,411.24  |
| 2                                    |                                | € 95,115,944.90 | € 49,984,760.82      | € 45,131,184.08   | 0.89                                    | € 40,166,593.17    | -€ 494,184,818.07  |
| 3                                    |                                | € 95,115,944.90 | € 49,984,760.82      | € 45,131,184.08   | 0.84                                    | € 37,893,012.42    | -€ 456,291,805.65  |
| 4                                    |                                | € 95,115,944.90 | € 49,984,760.82      | € 45,131,184.08   | 0.79                                    | € 35,748,124.93    | -€ 420,543,680.72  |
| 5                                    |                                | € 95,115,944.90 | € 49,984,760.82      | € 45,131,184.08   | 0.75                                    | € 33,724,646.16    | -€ 386,819,034.56  |
| 6                                    |                                | € 95,115,944.90 | € 49,984,760.82      | € 45,131,184.08   | 0.70                                    | € 31,815,703.92    | -€ 355,003,330.64  |
| 7                                    |                                | € 95,115,944.90 | € 49,984,760.82      | € 45,131,184.08   | 0.67                                    | € 30,014,815.02    | -€ 324,988,515.62  |
| 8                                    |                                | € 95,115,944.90 | € 49,984,760.82      | € 45,131,184.08   | 0.63                                    | € 28,315,863.23    | -€ 296,672,652.39  |
| 9                                    |                                | € 95,115,944.90 | € 49,984,760.82      | € 45,131,184.08   | 0.59                                    | € 26,713,078.52    | -€ 269,959,573.87  |
| 10                                   |                                | € 95,115,944.90 | € 49,984,760.82      | € 45,131,184.08   | 0.56                                    | € 25,201,017.47    | -€ 244,758,556.40  |
| 11                                   |                                | € 95,115,944.90 | € 49,984,760.82      | € 45,131,184.08   | 0.53                                    | € 23,774,544.78    | -€ 220,984,011.62  |
| 12                                   |                                | € 95,115,944.90 | € 49,984,760.82      | € 45,131,184.08   | 0.50                                    | € 22,428,815.83    | -€ 198,555,195.79  |
| 13                                   |                                | € 95,115,944.90 | € 49,984,760.82      | € 45,131,184.08   | 0.47                                    | € 21,159,260.22    | -€ 177,395,935.57  |
| 14                                   |                                | € 95,115,944.90 | € 49,984,760.82      | € 45,131,184.08   | 0.44                                    | € 19,961,566.24    | -€ 157,434,369.33  |
| 15                                   |                                | € 95,115,944.90 | € 49,984,760.82      | € 45,131,184.08   | 0.42                                    | € 18,831,666.27    | -€ 138,602,703.06  |
| 16                                   |                                | € 95,115,944.90 | € 49,984,760.82      | € 45,131,184.08   | 0.39                                    | € 17,765,722.89    | -€ 120,836,980.16  |
| 17                                   |                                | € 95,115,944.90 | € 49,984,760.82      | € 45,131,184.08   | 0.37                                    | € 16,760,115.94    | -€ 104,076,864.22  |
| 18                                   |                                | € 95,115,944.90 | € 49,984,760.82      | € 45,131,184.08   | 0.35                                    | € 15,811,430.13    | -€ 88,265,434.09   |
| 19                                   |                                | € 95,115,944.90 | € 49,984,760.82      | € 45,131,184.08   | 0.33                                    | € 14,916,443.52    | -€ 73,348,990.57   |
| 20                                   |                                | € 95,115,944.90 | € 49,984,760.82      | € 45,131,184.08   | 0.31                                    | € 14,072,116.53    | -€ 59,276,874.05   |
| 21                                   |                                | € 95,115,944.90 | € 49,984,760.82      | € 45,131,184.08   | 0.29                                    | € 13,275,581.63    | -€ 46,001,292.42   |
| 22                                   |                                | € 95,115,944.90 | € 49,984,760.82      | € 45,131,184.08   | 0.28                                    | € 12,524,133.61    | -€ 33,477,158.80   |
| 23                                   |                                | € 95,115,944.90 | € 49,984,760.82      | € 45,131,184.08   | 0.26                                    | € 11,815,220.39    | -€ 21,661,938.41   |
| 24                                   |                                | € 95,115,944.90 | € 49,984,760.82      | € 45,131,184.08   | 0.25                                    | € 11,146,434.33    | -€ 10,515,504.08   |
| 25                                   |                                | € 95,115,944.90 | € 49,984,760.82      | € 45,131,184.08   | 0.23                                    | € 10,515,504.08    | € 0.00             |
| *(jet fuel + diesel + yeast biomass) |                                |                 |                      |                   | NPV                                     | € 0.00             | MJSP = 1.83 €/l    |

Table S9. Discounted cash flow analysis for the calculation of MOSP (microbial oil scenario)

| Year                             | Total Capital Investment (TCI) | Income*         | Operational Expenses | Cash flow         | Discount factor $1/(1+i)^{\text{year}}$ | Net Present Values | Discounted payback     |
|----------------------------------|--------------------------------|-----------------|----------------------|-------------------|-----------------------------------------|--------------------|------------------------|
| -1                               | € 210,636,800.00               |                 |                      | -€ 210,636,800.00 | 1.00                                    | -€ 210,636,800.00  |                        |
| 0                                | € 315,955,200.00               |                 |                      | -€ 315,955,200.00 | 1.00                                    | -€ 315,955,200.00  |                        |
| 1                                |                                | € 89,942,804.81 | € 48,749,240.82      | € 41,193,564.00   | 0.94                                    | € 38,861,852.83    | -€ 487,730,147.17      |
| 2                                |                                | € 89,942,804.81 | € 48,749,240.82      | € 41,193,564.00   | 0.89                                    | € 36,662,125.31    | -€ 451,068,021.86      |
| 3                                |                                | € 89,942,804.81 | € 48,749,240.82      | € 41,193,564.00   | 0.84                                    | € 34,586,910.67    | -€ 416,481,111.20      |
| 4                                |                                | € 89,942,804.81 | € 48,749,240.82      | € 41,193,564.00   | 0.79                                    | € 32,629,161.01    | -€ 383,851,950.19      |
| 5                                |                                | € 89,942,804.81 | € 48,749,240.82      | € 41,193,564.00   | 0.75                                    | € 30,782,227.37    | -€ 353,069,722.82      |
| 6                                |                                | € 89,942,804.81 | € 48,749,240.82      | € 41,193,564.00   | 0.70                                    | € 29,039,837.14    | -€ 324,029,885.68      |
| 7                                |                                | € 89,942,804.81 | € 48,749,240.82      | € 41,193,564.00   | 0.67                                    | € 27,396,072.77    | -€ 296,633,812.91      |
| 8                                |                                | € 89,942,804.81 | € 48,749,240.82      | € 41,193,564.00   | 0.63                                    | € 25,845,351.67    | -€ 270,788,461.24      |
| 9                                |                                | € 89,942,804.81 | € 48,749,240.82      | € 41,193,564.00   | 0.59                                    | € 24,382,407.24    | -€ 246,406,054.00      |
| 10                               |                                | € 89,942,804.81 | € 48,749,240.82      | € 41,193,564.00   | 0.56                                    | € 23,002,270.98    | -€ 223,403,783.03      |
| 11                               |                                | € 89,942,804.81 | € 48,749,240.82      | € 41,193,564.00   | 0.53                                    | € 21,700,255.64    | -€ 201,703,527.39      |
| 12                               |                                | € 89,942,804.81 | € 48,749,240.82      | € 41,193,564.00   | 0.50                                    | € 20,471,939.28    | -€ 181,231,588.10      |
| 13                               |                                | € 89,942,804.81 | € 48,749,240.82      | € 41,193,564.00   | 0.47                                    | € 19,313,150.27    | -€ 161,918,437.84      |
| 14                               |                                | € 89,942,804.81 | € 48,749,240.82      | € 41,193,564.00   | 0.44                                    | € 18,219,953.08    | -€ 143,698,484.75      |
| 15                               |                                | € 89,942,804.81 | € 48,749,240.82      | € 41,193,564.00   | 0.42                                    | € 17,188,634.98    | -€ 126,509,849.77      |
| 16                               |                                | € 89,942,804.81 | € 48,749,240.82      | € 41,193,564.00   | 0.39                                    | € 16,215,693.38    | -€ 110,294,156.39      |
| 17                               |                                | € 89,942,804.81 | € 48,749,240.82      | € 41,193,564.00   | 0.37                                    | € 15,297,823.94    | -€ 94,996,332.45       |
| 18                               |                                | € 89,942,804.81 | € 48,749,240.82      | € 41,193,564.00   | 0.35                                    | € 14,431,909.38    | -€ 80,564,423.07       |
| 19                               |                                | € 89,942,804.81 | € 48,749,240.82      | € 41,193,564.00   | 0.33                                    | € 13,615,008.85    | -€ 66,949,414.22       |
| 20                               |                                | € 89,942,804.81 | € 48,749,240.82      | € 41,193,564.00   | 0.31                                    | € 12,844,347.97    | -€ 54,105,066.24       |
| 21                               |                                | € 89,942,804.81 | € 48,749,240.82      | € 41,193,564.00   | 0.29                                    | € 12,117,309.41    | -€ 41,987,756.84       |
| 22                               |                                | € 89,942,804.81 | € 48,749,240.82      | € 41,193,564.00   | 0.28                                    | € 11,431,423.97    | -€ 30,556,332.87       |
| 23                               |                                | € 89,942,804.81 | € 48,749,240.82      | € 41,193,564.00   | 0.26                                    | € 10,784,362.23    | -€ 19,771,970.63       |
| 24                               |                                | € 89,942,804.81 | € 48,749,240.82      | € 41,193,564.00   | 0.25                                    | € 10,173,926.64    | -€ 9,598,044.00        |
| 25                               |                                | € 89,942,804.81 | € 48,749,240.82      | € 41,193,564.00   | 0.23                                    | € 9,598,044.00     | € 0.00                 |
| *(microbial oil + yeast biomass) |                                |                 |                      |                   | <b>NPV</b>                              | <b>€ 0.00</b>      | <b>MOSP = 1.32 €/l</b> |
